# Supplementary material
Source: MDPI journal article supplement (https://www.mdpi.com/2311-5637/9/2/189)
Supplement: s1 [file s1]

**Table S1.** Composition of the non-treated lignocellulosic hydrolysate, a waste stream (spent liquor) from cellulose fiber production with acidic hydrolysis, used in this study for pretreatment and fermentation.

| Category                         | Compound                                                           | Concentration (g/L) | Standard deviation (g/L) |
|----------------------------------|--------------------------------------------------------------------|---------------------|--------------------------|
| Monomeric sugar                  | <b>total sugar</b>                                                 | <b>115.60</b>       | <b>4.99</b>              |
|                                  | Xylose                                                             | 77.05               | 2.46                     |
|                                  | Glucose                                                            | 11.51               | 0.39                     |
|                                  | Mannose                                                            | 8.21                | 0.84                     |
|                                  | Galactose                                                          | 6.47                | 0.21                     |
|                                  | Rhamnose                                                           | 5.87                | 0.24                     |
|                                  | Arabinose                                                          | 4.93                | 0.42                     |
|                                  | Fucose                                                             | 1.57                | 0.44                     |
| Organic acids                    | <b>total organic acids</b>                                         | <b>16.84</b>        | <b>1.43</b>              |
|                                  | Acetic acid                                                        | 12.34               | 1.20                     |
|                                  | Galacturonic acid                                                  | 4.51                | 0.23                     |
| Sulfates                         | <b>H<sub>2</sub>SO<sub>4</sub> and X<sub>2</sub>SO<sub>4</sub></b> | <b>19.40</b>        | <b>2.00</b>              |
| Furans                           | <b>total furans</b>                                                | <b>5.21</b>         | <b>0.64</b>              |
|                                  | HMF                                                                | 4.53                | 0.59                     |
|                                  | Furfural                                                           | 0.68                | 0.04                     |
| Lignols, lignans and metabolites | <b>total lignols, lignans and metabolites</b>                      | <b>89.95</b>        | <b>22.97</b>             |
| Ash                              | <b>total Ash</b>                                                   | <b>0.700</b>        | <b>0.009</b>             |
|                                  | O                                                                  | 0.316               |                          |
|                                  | Ca                                                                 | 0.142               |                          |
|                                  | Fe                                                                 | 0.044               |                          |
|                                  | C                                                                  | 0.044               |                          |
|                                  | S                                                                  | 0.041               |                          |
|                                  | P                                                                  | 0.035               |                          |
|                                  | Mg                                                                 | 0.025               |                          |
|                                  | K                                                                  | 0.017               |                          |
|                                  | Si                                                                 | 0.013               |                          |
|                                  | Mn                                                                 | 0.010               |                          |
|                                  | Al                                                                 | 0.009               |                          |
|                                  | Cr                                                                 | 0.003               |                          |
|                                  | Na                                                                 | 0.002               |                          |
|                                  | N                                                                  | NA                  |                          |
| <b>dry mass</b>                  | <b>total dry mass</b>                                              | <b>247.70</b>       | <b>13.90</b>             |

**Table S2.** Pretreatment strategies with respective growth behavior and microscope examination.

| Starting material | Sugar conc. in % | Neutralization                      | additional Treatment                                                                      | Sterilization          | Av. max. OD <sub>600</sub> | Microscope examination | Batch |
|-------------------|------------------|-------------------------------------|-------------------------------------------------------------------------------------------|------------------------|----------------------------|------------------------|-------|
| LCH               | 3                | NaOH                                | non                                                                                       | filtered               | 0.93                       | insoluble particles    | 1     |
| LCH               | 3                | NaOH                                | non                                                                                       | 70°C, 1h               | 0.92                       | insoluble particles    | 1     |
| LCH               | 3                | NaOH                                | non                                                                                       | 95°C, 30 min           | 0.89                       | insoluble particles    | 1     |
| LCH               | 3                | NaOH                                | non                                                                                       | 121°C, 15 min          | 0.86                       | insoluble particles    | 1     |
| LCH               | 3                | CaCO <sub>3</sub> , NaOH            | non                                                                                       | filtered               | 1.74                       | insoluble particles    | 1     |
| LCH               | 5                | CaCO <sub>3</sub> , NaOH            | non                                                                                       | filtered               | 1.81                       | insoluble particles    | 1     |
| LCH               | 7                | CaCO <sub>3</sub> , NaOH            | non                                                                                       | filtered               | 1.71                       | insoluble particles    | 1     |
| LCH               | 3                | CaCO <sub>3</sub> , NaOH            | overliming to pH 10 with Ca(OH) <sub>2</sub> , neutral. with HCl                          |                        | 1.85                       | insoluble particles    | 1     |
| XGA               | 3                | -                                   | non                                                                                       | 121°C, 15 min          | 0.8                        | fine                   | 1     |
| XGA               | 5                | -                                   | non                                                                                       | 121°C, 15 min          | 0.59                       | fine                   | 1     |
| XGA               | 7                | -                                   | non                                                                                       | 121°C, 15 min          | 0.48                       | fine                   | 1     |
| LCH               | 3                | CaCO <sub>3</sub> 1g, NaOH          | non                                                                                       | filtered               | 0.84                       | insoluble particles    | 2     |
| LCH               | 3                | CaCO <sub>3</sub> 500mg, NaOH       | non                                                                                       | filtered               | 1.10                       | insoluble particles    | 2     |
| LCH               | 3                | CaCO <sub>3</sub> 300mg, NaOH       | non                                                                                       | filtered               | 0.94                       | insoluble particles    | 2     |
| LCH               | 3                | CaCO <sub>3</sub> 200mg, NaOH       | non                                                                                       | filtered               | 0.94                       | insoluble particles    | 2     |
| LCH               | 3                | CaCO <sub>3</sub> 200mg, NaOH, EDTA | non                                                                                       | filtered               | 0.15                       | insoluble particles    | 2     |
| LCH               | 3                | CaCO <sub>3</sub> 1g, NaOH          | no addition of medium salts                                                               | filtered               | 0.72                       | fine                   | 3     |
| LCH               | 3                | CaCO <sub>3</sub> 1g, NaOH          | no additions of phosphates                                                                | filtered               | 0.80                       | fine                   | 3     |
| LCH               | 3                | CaCO <sub>3</sub> 1g, NaOH          | only additions of KH <sub>2</sub> PO <sub>4</sub> , MgSO <sub>4</sub> , CaCl <sub>2</sub> | filtered               | 0.78                       | insoluble particles    | 3     |
| LCH               | 3                | CaCO <sub>3</sub> , NaOH            | KH <sub>2</sub> PO <sub>4</sub> , salts addition before autocl.                           | filtered, 121°C, 15min | 0.25                       | insoluble particles    | 3     |
| LCH               | 3                | CaCO <sub>3</sub> , NaOH            | KH <sub>2</sub> PO <sub>4</sub> , salts addition after autocl.                            | filtered, 121°C, 15min | 1.02                       | insoluble particles    | 3     |
| LCH               | 3                | CaCO <sub>3</sub> , NaOH            | salts addition before autocl.                                                             | filtered, 121°C, 15min | 0.03                       | insoluble particles    | 3     |
| LCH               | 3                | CaCO <sub>3</sub> , NaOH            | salts addition after autocl.                                                              | filtered, 121°C, 15min | 1.30                       | insoluble particles    | 3     |
| XGA               | 3                | -                                   | non                                                                                       | filtered               | 1.16                       | insoluble particles    | 4     |
| LCH               | 3                | NaOH                                | non                                                                                       | filtered               | 1.07                       | insoluble particles    | 4     |
| LCH               | 3                | NaOH                                | Active charcole                                                                           | filtered               | 0.59                       | insoluble particles    | 4     |
| LCH               | 3                | CaCO <sub>3</sub> , NaOH            | KH <sub>2</sub> PO <sub>4</sub>                                                           | filtered               | 1.14                       | fine                   | 4     |
| LCH               | 3                | CaCO <sub>3</sub> , NaOH            | H <sub>3</sub> PO <sub>4</sub>                                                            | filtered               | 0.98                       | fine                   | 4     |

**Table S3.** Sugar and organic acid composition of the untreated LCH and pretreated LCH.

| Compound                     | Untreated LCH (g/L)  | Pretreated LCH (g/L) |
|------------------------------|----------------------|----------------------|
| Xylose                       | 96.56 ± 0.78         | 91.66 ± 1.48         |
| Glucose                      | 14.42 ± 0.15         | 13.89 ± 0.22         |
| Mannose                      | 10.25 ± 0.20         | 9.38 ± 0.34          |
| Galactose                    | 8.11 ± 0.07          | 7.70 ± 0.12          |
| Rhamnose                     | 7.35 ± 0.07          | 6.96 ± 0.12          |
| Arabinose                    | 6.205 ± 0.07         | 6.24 ± 0.09          |
| Acetic acid                  | 13.79 ± 0.06         | 18.55 ± 0.32         |
| Galacturonic acid            | 5.37 ± 0.05          | 5.47 ± 0.32          |
| Total sugar and organic acid | <b>162.05 ± 1.44</b> | <b>159.85 ± 2.80</b> |

**Table S4.** Duncan groups of the statistical analysis of the fatty acid profile, ordered by fermentation condition and fatty acid; p-value < 0.01; groups starting with the highest share in group a.

| Fermentation condition | Palmitic acid C16:0 in % | Duncan groups Palmitic acid C16:0 | Stearic acid C18:0 in % | Duncan groups Stearic acid C18:0 | Oleic acid C18:1 in % | Duncan groups Oleic acid C18:1 | Linoleic acid C18:2 in % | Duncan groups Linoleic acid C18:2 |
|------------------------|--------------------------|-----------------------------------|-------------------------|----------------------------------|-----------------------|--------------------------------|--------------------------|-----------------------------------|
| XGA, cb-feed           | 24.8                     | ab                                | 14.8                    | c                                | 54.0                  | a                              | 6.2                      | ab                                |
| Glucose, cb-feed       | 22.5                     | b                                 | 19.4                    | a                                | 51.5                  | b                              | 6.4                      | a                                 |
| Xylose, cb-feed        | 22.9                     | ab                                | 17.0                    | b                                | 54.1                  | a                              | 5.7                      | ab                                |
| LCH, cb-feed           | 24.5                     | ab                                | 16.0                    | bc                               | 54.5                  | a                              | 4.9                      | b                                 |
| LCH, co-feed           | 25.1                     | a                                 | 14.6                    | c                                | 54.6                  | a                              | 5.4                      | b                                 |

**Table S5.** GC-FID relative quantification of LCH derived lignin breakdown products before and after the fermentation with *C. oleaginosus*.

| Extracted LCH containing media before/after fermentation | GC-MS identified compound | Retention time GC-FID (min) | Mean of area | Standard deviation of area | Relative area to ISTD | Standard deviation relative to ISTD | n |
|----------------------------------------------------------|---------------------------|-----------------------------|--------------|----------------------------|-----------------------|-------------------------------------|---|
| before                                                   | Vanilin                   | 15.52                       | 1886754      | 111589                     | 0.10666               | 0.00169                             | 3 |
| before                                                   | Vanilic acid hydrazide    | 17.78                       | 139919       | 21747                      | 0.00791               | 0.00108                             | 3 |
| before                                                   | Syringaldehyde            | 18.62                       | 3135042      | 136088                     | 0.17731               | 0.00134                             | 3 |
| before                                                   | Acetosyringone            | 19.40                       | 30804        | 1824                       | 0.00174               | 0.00010                             | 3 |
| before                                                   | Eicosane                  | 21.57                       | 17683655     | 836307                     | 1.00000               | 0                                   | 3 |
| after                                                    | Vanilin                   | 15.52                       | NA           | NA                         | 0                     | 0                                   | 3 |
| after                                                    | Vanilic acid hydrazide    | 17.78                       | NA           | NA                         | 0                     | 0                                   | 3 |
| after                                                    | Syringaldehyde            | 18.62                       | 392635       | 150845                     | 0.02456               | 0.01110                             | 3 |
| after                                                    | Acetosyringone            | 19.40                       | NA           | NA                         | 0                     | 0                                   | 3 |
| after                                                    | Eicosane                  | 21.57                       | 16623897     | 2630691                    | 1.00000               | 0                                   | 3 |

**Table S6.** Share of LCH from the overall consumed carbon for the different feeding strategies.

| Feeding strategy                                   | Total consumed carbon (g/L) | Consumed LCH carbon (g/L) | Share of LCH on total carbon (%) |
|----------------------------------------------------|-----------------------------|---------------------------|----------------------------------|
| <b>Consumption-based feed with 50% acetic acid</b> | 153.37 ± 20.94              | 4.26                      | 2.8                              |
| Acetic acid:LCH 50:10                              | 169.78 ± 0.3                | 11.32                     | 6.7                              |
| Acetic acid:LCH 50:50                              | 182.07 ± 9.82               | 22.76                     | 12.5                             |
| LCH continuous feed 0.5 mL/h                       | 154.0 ± 0.6                 | 15.98                     | 10.4                             |
| LCH continuous feed 1 mL/h                         | 139.76 ± 16.15              | 29.74                     | 21.3                             |

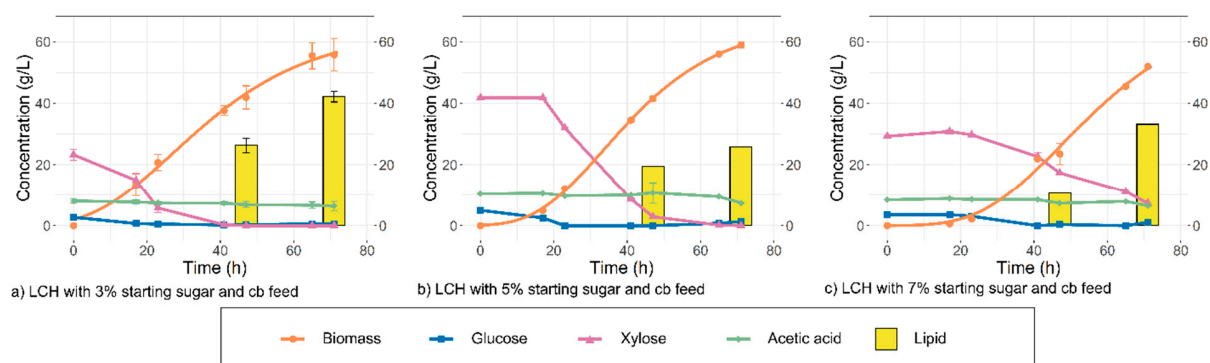

**Figure S1.** Comparison between three different starting concentration of LCH in the fermentation media. Regarding to the carbon source content 3% (a), 5% (b) and 7% (c) starting carbon were applied. Error bars display two-times standard deviation. LCH - Lignocellulosic hydrolysate, cb-feed – consumption-based acetic acid feed.

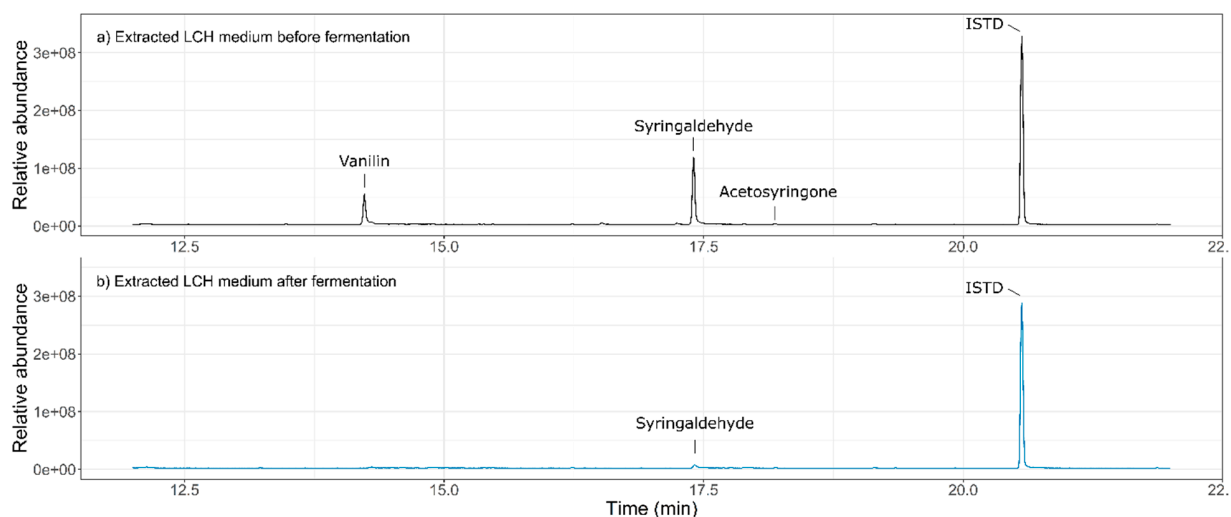

**Figure S2.** GC-MS chromatogrammes of fermentation medium of LCH (22.3% LCH) extracted with methyl *tert*-butyl ether, before (a) and after (b) consumption-based acetic acid fed fermentation with *C. oleaginosus*.

5

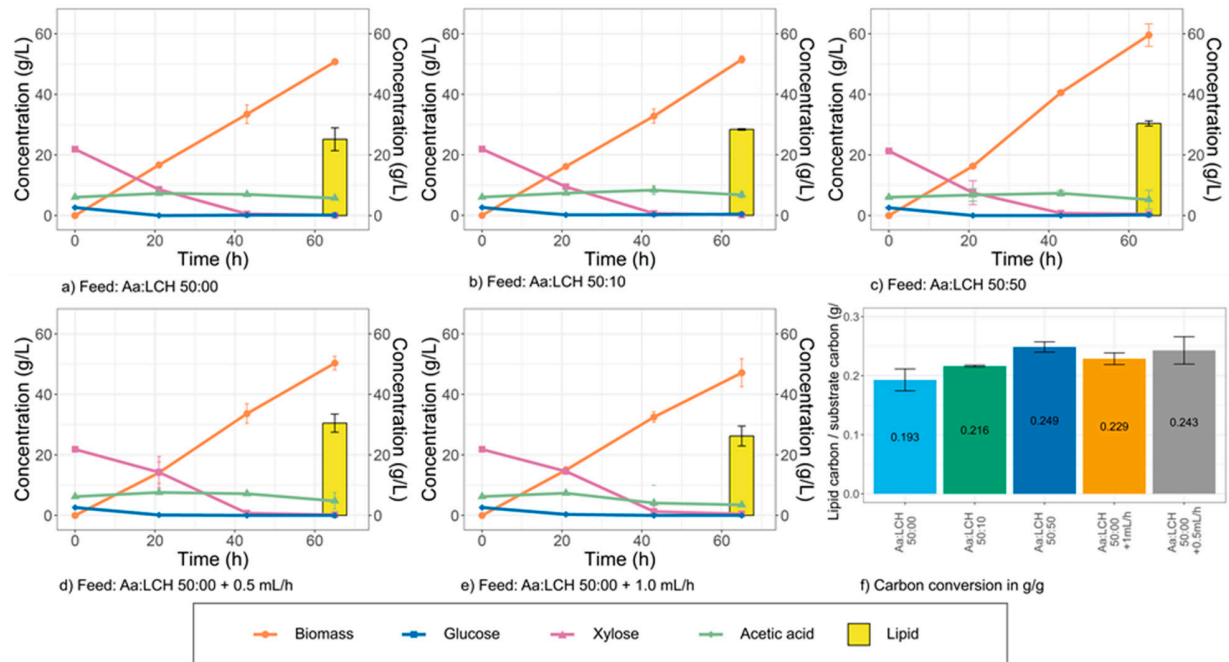

**Figure S3.** (a – e) Comparison between five different feeding strategies of LCH. (f) Carbon conversion rate in lipid carbon/substrate carbon (g/g), without significant differences detected, as confirmed by ANOVA. Error bars display two-times standard deviation. LCH - Lignocellulosic hydrolysate, cb-feed – consumption-based acetic acid feed.
